# Supplementary material for: Tissue Immunostaining of Candidate Prognostic Proteins in Metastatic and Non-metastatic Prostate Cancer
Source: Research Square preprint supplement (doi:10.21203/rs.3.rs-1343436/v1), 2022-03-11
Supplement: Supplementary file 1 [file 751d004735afba1a3f96241d.docx]

**Tissue immunostaining of candidate prognostic proteins in metastatic and non-metastatic prostate cancer**

Journal of Cancer Research and Clinical Oncology

Érica Romão Pereira1; Amanda Letícia Francelino1; Laís Capelasso Lucas Pinheiro1; Carlos Alberto Miqueloto2; Alda Fiorina Maria Losi Guembarovski3; Karen Brajão de Oliveira4; Paulo Emílio Fuganti5; Ilce Mara de Syllos Cólus1; Roberta Losi Guembarovski1*.

1 Laboratory of Mutagenesis and Oncogenetics, Department of General Biology, Londrina State University, Londrina, PR, Brazil

2 Laboratory of Extracellular Matrix, Department of General Biology, Londrina State University, Londrina, PR, Brazil

3 Department of Pathology, Clinical and Toxicological Analysis, Londrina State University, Londrina, PR, Brazil

4 Laboratory of Molecular Genetics and Immunology. Department of Pathological Science, Londrina State University, Londrina, PR, Brazil

5 Cancer Hospital of Londrina - HCL, Londrina, PR, Brazil

*Corresponding author: Tel: +55-43-33715149; E-mail: [robertalosi@uel.br](mailto:robertalosi@uel.br)

**Table 1** Analysis of PTEN and AKT immunostaining in the group with the best prognosis by the crosses methodology

|  | **PTEN** | | | |  | **AKT** | | | |
| --- | --- | --- | --- | --- | --- | --- | --- | --- | --- |
|  | **Tumor staining** | | **Adjacent non-tumor staining** | |  | **Tumor staining** | | **Adjacent non-tumor staining** | |
| **Patients** | **Cytoplasm** | **Nucleus** | **Cytoplasm** | **Nucleus** |  | **Cytoplasm** | **Nucleus** | **Cytoplasm** | **Nucleus** |
| PT144 | 0 | 0 | 0 | 0 |  | + | + | + | + |
| PT149 | + | 0 | + | 0 |  | + | 0 | + | 0 |
| PT175 | 0 | + | 0 | 0 |  | 0 | + | 0 | + |
| PT178 | + | 0 | + | 0 |  | ++ | + | ++ | + |
| PT180 | + | 0 | 0 | 0 |  | ++ | + | + | + |
| PT188 | + | 0 | + | 0 |  | + | 0 | + | 0 |
| PT235 | + | 0 | ++ | 0 |  | + | 0 | + | 0 |
| PT240 | - | - | - | - |  | - | - | - | - |
| PT246 | 0 | + | 0 | 0 |  | 0 | ++ | 0 | ++ |
| PT266 | 0 | + | 0 | + |  | + | + | 0 | + |
| PT271 | 0 | 0 | 0 | + |  | 0 | + | 0 | + |
| PT308 | + | ++ | + | + |  | + | ++ | + | + |
| PT318 | 0 | + | 0 | + |  | 0 | + | 0 | + |
| PT320 | 0 | 0 | 0 | + |  | 0 | ++ | 0 | + |
| PT332 | 0 | 0 | 0 | + |  | 0 | + | 0 | + |
| PT345 | 0 | + | 0 | 0 |  | 0 | + | 0 | + |
| PT347 | 0 | 1 | 0 | 0 |  | + | + | 0 | + |
| PT359 | 0 | 0 | 0 | 0 |  | 0 | + | 0 | ++ |
| PT374 | 0 | 0 | 0 | + |  | 0 | + | 0 | + |
| PT383 | - | - | - | - |  | - | - | - | - |
| PT384 | + | 0 | ++ | + |  | + | 0 | ++ | + |

The immunostaining are presented as follow: (0) no staining; (+) weak staining; (++) intermediary staining; (+++) strong staining e (-) no data.
