# Supplementary material for: Tissue Immunostaining of Candidate Prognostic Proteins in Metastatic and Non-metastatic Prostate Cancer
Source: Research Square preprint supplement (doi:10.21203/rs.3.rs-1343436/v1), 2022-03-11
Supplement: Supplementary file 2 [file bb8b4764859100b06c98dc37.docx]

**Tissue immunostaining of candidate prognostic proteins in metastatic and non-metastatic prostate cancer**

Journal of Cancer Research and Clinical Oncology

Érica Romão Pereira1; Amanda Letícia Francelino1; Laís Capelasso Lucas Pinheiro1; Carlos Alberto Miqueloto2; Alda Fiorina Maria Losi Guembarovski3; Karen Brajão de Oliveira4; Paulo Emílio Fuganti5; Ilce Mara de Syllos Cólus1; Roberta Losi Guembarovski1*.

1 Laboratory of Mutagenesis and Oncogenetics, Department of General Biology, Londrina State University, Londrina, PR, Brazil

2 Laboratory of Extracellular Matrix, Department of General Biology, Londrina State University, Londrina, PR, Brazil

3 Department of Pathology, Clinical and Toxicological Analysis, Londrina State University, Londrina, PR, Brazil

4 Laboratory of Molecular Genetics and Immunology. Department of Pathological Science, Londrina State University, Londrina, PR, Brazil

5 Cancer Hospital of Londrina - HCL, Londrina, PR, Brazil

*Corresponding author: Tel: +55-43-33715149; E-mail: [robertalosi@uel.br](mailto:robertalosi@uel.br)

**Table 3** Analysis of PTEN and AKT immunostaining in the metastatic group by the crosses methodology

|  | **PTEN** | | | |  | **AKT** | | | |
| --- | --- | --- | --- | --- | --- | --- | --- | --- | --- |
|  | **Tumor staining** | | **Adjacent non-tumor staining** | |  | **Tumor staining** | | **Adjacent non-tumor staining** | |
| **Patients** | **Cytoplasm** | **Nucleus** | **Cytoplasm** | **Nucleus** |  | **Cytoplasm** | **Nucleus** | **Cytoplasm** | **Nucleus** |
| PT024 | 0 | 0 | 0 | 0 |  | + | 0 | 0 | 0 |
| PT129 | + | 0 | - | - |  | + | 0 | - | - |
| PT140 | 0 | 0 | 0 | + |  | + | + | + | + |
| PT163 | + | 0 | + | 0 |  | + | 0 | + | 0 |
| PT202 | 0 | 0 | 0 | 0 |  | 0 | 0 | + | 0 |
| PT249 | + | 0 | 0 | 0 |  | + | + | 0 | 0 |
| PT269 | - | - | - | - |  | - | - | - | - |
| PT280 | 0 | ++ | 0 | + |  | + | ++ | + | + |
| PT284 | ++ | 0 | ++ | 0 |  | ++ | + | ++ | 0 |
| PT287 | + | 0 | + | 0 |  | + | 0 | + | 0 |
| PT295 | + | ++ | + | + |  | + | ++ | + | + |
| PT326 | 0 | + | 0 | + |  | + | ++ | + | ++ |
| PT333 | 0 | ++ | 0 | ++ |  | + | ++ | 0 | ++ |
| PT338 | 0 | 0 | 0 | 0 |  | ++ | + | + | + |
| PT361 | + | + | 0 | 0 |  | + | ++ | 0 | + |
| PT377 | + | + | + | + |  | + | + | + | + |
| PT385 | + | 0 | 0 | 0 |  | + | 0 | + | 0 |

The immunostaining are presented as follow: (0) no staining; (+) weak staining; (++) intermediary staining; (+++) strong staining e (-) no data.
